# Supplementary material for: Extraction and Determination of Vitamin K1 in Foods by Ultrasound-Assisted Extraction, SPE, and LC-MS/MS
Source: PubMed Central journal article supplement (PMC7070738; doi:10.3390/molecules25040839), 2020-02-14

## Supplementary materials

**Figure S1.** Calibration curve of vitamin K<sub>1</sub>

**Figure S2.** MS/MS spectrum of vitamin K<sub>1</sub> and vitamin K<sub>1</sub>-D<sub>7</sub>: (a) vitamin K<sub>1</sub> full scan, (b) vitamin K<sub>1</sub> product ion scan, (c) vitamin K<sub>1</sub>-D<sub>7</sub> full scan, (d) vitamin K<sub>1</sub>-D<sub>7</sub> product ion scan

Figure S1. Calibration curve of vitamin K<sub>1</sub>

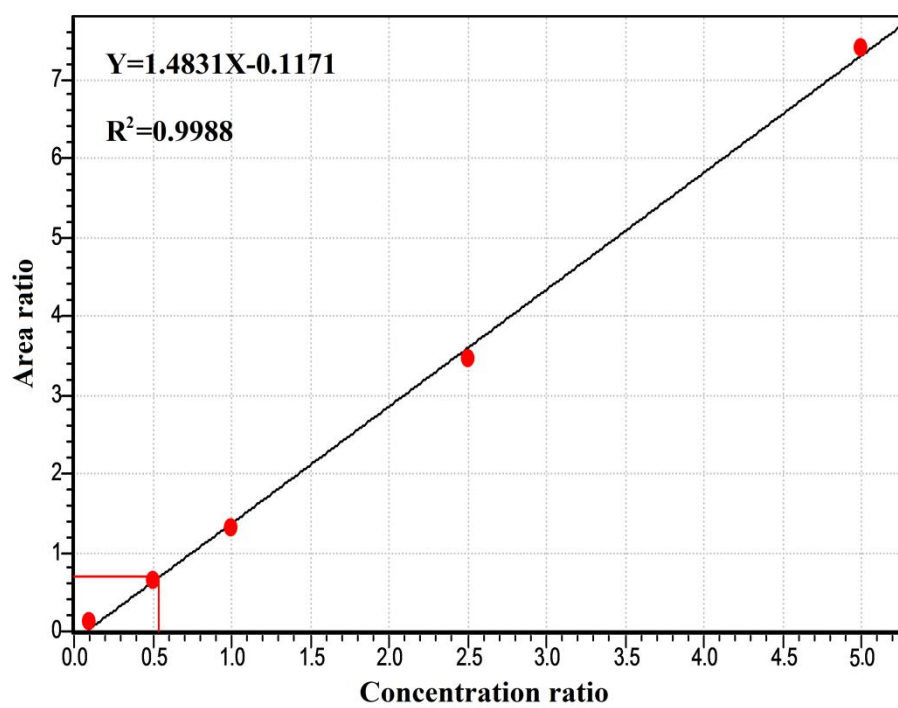

**Figure S2.** MS/MS spectrum of vitamin K<sub>1</sub> and vitamin K<sub>1</sub>-D<sub>7</sub>: (a) vitamin K<sub>1</sub> full scan, (b) vitamin K<sub>1</sub> product ion scan, (c) vitamin K<sub>1</sub>-D<sub>7</sub> full scan, (d) vitamin K<sub>1</sub>-D<sub>7</sub> product ion scan

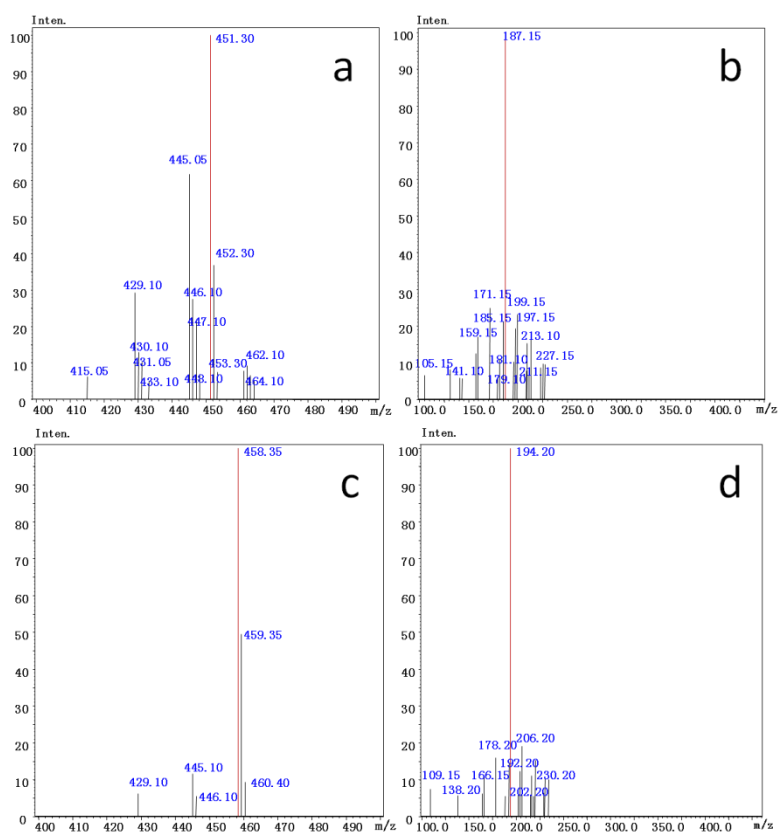

Supplement: molecules-25-00839-s001.pdf [file molecules-25-00839-s001.pdf]
